# Supplementary material for: The German COVID-19 Digital Contact Tracing App: A Socioeconomic Evaluation
Source: MDPI journal article supplement (doi:10.3390/ijerph192114318), 2022-11-02
Supplement: s1 [file s1]

**Table S1.** Parameters modified in the sensitivity analysis.

| Parameter                                                         | Base value                                    | Lower limit | Upper limit |
|-------------------------------------------------------------------|-----------------------------------------------|-------------|-------------|
| Financial Mathematics                                             |                                               |             |             |
| Interest rate                                                     | 0.7%                                          | 0.63%       | 0.77%       |
| App-related                                                       |                                               |             |             |
| Proportion of data donors                                         | 58.6%                                         | 52.7%       | 64.5%       |
| Rate of shared positive test results                              | 60.1%                                         | 54.1%       | 66.1%       |
| Rate of performed tests after red warning                         | 87.0%                                         | 78.3%       | 95%         |
| Share of active users in total downloads                          | 59.9%                                         | 53.9%       | 65.9%       |
| Cost of the app                                                   | Varying over time, UL/LL modeled with ±10%    |             |             |
| Disease evolution and demographics                                |                                               |             |             |
| R-value                                                           | Varying over time, UL/LL correspond to 95% CI |             |             |
| New infections/day                                                | Varying over time, UL/LL correspond to 95% CI |             |             |
| Proportion of employed persons in infections                      | Varying over time, UL/LL modeled with ±10%    |             |             |
| Probability per year for a retiree to die independent of COVID-19 | 4.96%                                         | 4.46%       | 5.5%        |
| Monthly average pension                                           | 1,012 €                                       | 911 €       | 1,113 €     |
| Share of retirees in deaths                                       | 89.5%                                         | 80.6%       | 95%         |
| Proportion of employed persons in deaths                          | 10.3%                                         | 9.3%        | 11.3%       |
| R-value modeling                                                  |                                               |             |             |
| Constant f used to estimate R-value reduction by the CWA          | 0.8741                                        | 0.3651      | 1.383       |
| Regression to estimate the infection rate from $R_{hyp}$          |                                               |             |             |
| Slope                                                             | 0.1064                                        | 0.1034      | 0.1095      |
| y-intercept                                                       | -0.04353                                      | -0.04669    | -0.04038    |
| Indirect health care costs                                        |                                               |             |             |
| Isolation period                                                  | 22 days                                       | 14 days     | 28 days     |
| GDP per capita per year                                           | 36,600 €                                      | 32,940 €    | 40,260 €    |
| Direct health care costs                                          |                                               |             |             |
| Share of patients requiring hospitalization                       | Varying over time, UL/LL modeled with ±10%    |             |             |
| Share of patients requiring intensive care                        | Varying over time, UL/LL modeled with ±10%    |             |             |
| Hospitalization costs per patient                                 | 6,600 €                                       | 5,940 €     | 7,260 €     |
| Intensive care costs per patient                                  | 26,000 €                                      | 23,400 €    | 28,600 €    |
| Daily wage for rehabilitation                                     | 211 €                                         | 189.90 €    | 232.10 €    |
| Duration of rehabilitation                                        | 27 days                                       | 21 days     | 33 days     |
| Proportion of employed persons requiring rehabilitation           | 85.2%                                         | 83.7%       | 86.7%       |
| Proportion of intensive care patients in need of rehabilitation   | 100%                                          | 90%         | 100%        |
| Proportion of hospitalized patients in need of rehabilitation     | 50%                                           | 30%         | 70%         |
| Cost per PCR test                                                 | 53.54 €                                       | 48.19 €     | 58.89 €     |
| Cost per rapid test                                               | 11.50 €                                       | 10.35 €     | 12.65 €     |
| Test positivity rate                                              | Varying over time, UL/LL modeled with ±10%    |             |             |

UL/LL: Upper Limit/Lower Limit. CI: Confidence interval.
